1 The Salivary Microbiome: Analysis of by Pyrosequencing and the Relationship with *Helicobacter*  
2 *pylori* Infection

3

4 Yingjie Ji, <sup>a</sup> Xiao Liang<sup>a</sup> and Hong Lu<sup>a</sup> #

5

6 <sup>a</sup> Division of Gastroenterology and Hepatology, Shanghai Institute of Digestive Disease; Key  
7 Laboratory of Gastroenterology and Hepatology, Ministry of Health; Renji Hospital, School of  
8 Medicine, Shanghai Jiao Tong University, Shanghai, China

9

10 Running Head: Relationship between salivary microbiome and *Helicobacter pylori* Infection

11

12 # Address correspondence to Hong Lu, [hlu@sjtu.edu.cn](mailto:hlu@sjtu.edu.cn)

13 Y.J.J and X.L contributed equally to this work.

14

15 Words count of abstract: 249

16 Words count of text: 3806

17

## Abstracts

18  
19  
20  
21  
22  
23  
24  
25  
26  
27  
28  
29  
30  
31  
32  
33  
34  
35  
36  
37  
38

**Backgrounds:** There have been reports of *Helicobacter pylori* (*H. pylori*) in the oral cavity and it has been suggested that the oral cavity may be a reservoir for *H. pylori* reflux from the stomach.

**Objectives:** High-throughput pyrosequencing was used to assess the structure and composition of oral microbiota communities in individuals with or without confirmed *H. pylori* infection.

**Methods:** Saliva samples were obtained from 34 *H. pylori* infected and 24 *H. pylori* uninfected subjects. Bacterial genomic DNA was extracted and examined by pyrosequencing by amplification of the 16S rDNA V3-V4 hypervariable regions followed by bioinformatics analysis. Saliva sampling was repeated from 22 of the 34 *H. pylori* infected subjects 2 months after *H. pylori* eradication.

**Results:** High-quality sequences (2,812,659) clustered into 95,812 operational taxonomic units (OTUs; 97% identity), representing 440 independent species belonging to 138 genera, 68 families, 36 orders, 21 classes, and 11 phyla. Species richness (alpha diversity) of *H. pylori* infected subjects was similar to that of uninfected subjects. Eradication treatment decreased saliva bacterial diversity. Beta diversity analysis showed that the salivary microbial community structure differed between *H. pylori* infected and uninfected subjects both before and after *H. pylori* eradication.

**Conclusions:** Salivary microbiota diversity was similar in *H. pylori* infected and uninfected individuals. Antibiotic therapy was associated with a decline in salivary bacterial diversity. Both *H. pylori* infection and its eradication caused the oral microbiota alterations in community and structure. The present of *H. pylori* in oral cavity was not related with its infection status in stomach.

**Trial registration:** ClinicalTrials.gov, Identifier: NCT03730766

**Keywords:** *Helicobacter pylori*, salivary microbiota, pyrosequencing, 16S rDNA

## Importance

39

40 The oral cavity plays a vital role in *Helicobacter pylori* transmission among human.

41 High-throughput pyrosequencing of the 16S rDNA V3-V4 hypervariable regions was used to assess the

42 structure and composition of oral microbiota communities in individuals with or without confirmed

43 *Helicobacter pylori* infection. We show that both *Helicobacter pylori* infection and eradication cause

44 microbiota alterations in the oral microbiota. Prior studies report detection of *Helicobacter pylori* in the

45 oral cavity by polymerase chain reaction. We show that the presence of *Helicobacter pylori* in the oral

46 cavity is unrelated with its infection status in the stomach.

47

## Introduction

48

49 *Helicobacter pylori* (*H. pylori*) is a Gram-negative bacterium that colonizes the human gastric  
50 epithelium. It belonged to *Helicobacter* genus, *Helicobacteraceae* family, *Campylobacterales* order,  
51 *Epsilonproteobacteria* class, and *Proteobacteria* phyla. *H. pylori* infection is characterized by mucosal  
52 inflammation (gastritis) and may result in peptic ulcer disease or gastric adenocarcinoma (1). *H. pylori*  
53 is transmitted between humans by a variety of routes including gastro-oral and fecal-oral mechanisms  
54 that include contaminated water and food. It has also been postulated that oral cavity may play a role in  
55 *H. pylori* transmission and possibly act as a reservoir (2). For example, *H. pylori* has been detected in  
56 the oral cavity using the polymerase chain reaction (PCR). *H. pylori* has also been successfully cultured  
57 from saliva from individuals with positive results of both a saliva *H. pylori* antigen test and *H. pylori*  
58 flagella test (3).

59 The oral cavity is one of the most complex and largest microbial habitats that harbors hundreds of  
60 different bacteria which play important roles in maintaining oral homeostasis and influencing the  
61 development of both oral and systematic diseases (4). Many factors in the oral environment including  
62 intraoral pH and salivary iron concentration have been reported to have significant relationships with  
63 oral microbial communities (5). However, there was few reports about *H. pylori* and its relationship  
64 with the microbial community structure in human saliva.

65 Currently, most oral bacteria species cannot be cultivated *in vitro* using traditional cultivation  
66 methods requiring the use of molecular biological techniques, such as checkerboard hybridization,  
67 microarray chips, and the quantitative real-time PCR (6) to identify and classify the currently  
68 uncultivable bacteria. However, many low-abundance bacteria species still cannot be detected using

69 these approaches which impedes the comprehensive and in-depth understanding of oral bacteria  
70 diversity. In this study, we used amplicon pyrosequencing of 16S rDNA V3-V4 hypervariable regions  
71 to define the bacterial composition, abundance, and structure of salivary microbiome in people with  
72 and without active *H. pylori* infections. In addition, we also characterized the salivary biodiversity of a  
73 subgroup of subjects before and after the *H. pylori* eradication.

74

## Methods

75

### 76 Subjects and Sample Collections

77 This study was performed in accordance with the recommendations of the Ethics Committee of  
78 the Renji Hospital of Shanghai Jiao Tong University. All subjects gave written informed consent in  
79 accordance with Declaration of Helsinki.

80 The samples were collected in Renji Hospital of Shanghai Jiao Tong University, China, from  
81 August to November in 2018. A total of 58 subjects were recruited, including 34 subjects with *H. pylori*  
82 infection and 24 uninfected subjects. We first conducted a cross-sectional study of the salivary  
83 microbiota of 34 *H. pylori* infected and 24 uninfected subjects. A prospective study was then performed  
84 in a subgroup of 22 subjects with *H. pylori* infection who underwent salivary analysis both before and  
85 after successful *H. pylori* eradication.

86 All subjects received both endoscopy and  $^{13}\text{C}$  urea breath test ( $^{13}\text{C}$ -UBT) before enrollment. The *H.*  
87 *pylori* infection status was confirmed by positive rapid urease test (RUT), histology and  $^{13}\text{C}$ -UBT.  
88 Absence of infection was defined as negative results for all tests (i.e., RUT, histology and  $^{13}\text{C}$ -UBT). *H.*  
89 *pylori* infected subjects received eradication therapy consisting of esomeprazole 20 mg b.i.d., bismuth  
90 potassium citrate 600 mg b.i.d, amoxicillin 1000 mg t.i.d., and metronidazole 400 mg t.i.d. for 14 days.  
91 *H. pylori* eradication was confirmed by  $^{13}\text{C}$ -UBT at least 6 weeks after the end of treatment. Saliva  
92 samples were collected from 22 subjects both before and 2 months following successful *H. pylori*  
93 eradication. Subjects were characterized into four groups. *H. pylori* uninfected group (uninfected)  
94 (n=24), *H. pylori* infected group (infected) (n=34), and Pre-eradicated *H. pylori* infected group  
95 (pre-eradicated) (n=22) and a successful eradicated group (eradicated) (n=22). Inclusion criteria of

96 subjects were: age of 20-65 years old male or female, with good oral hygiene (including brushing teeth  
97 twice a day) and with no bad eating habits (7). Exclusion criteria included: 1) the presence of dental  
98 carious or any untreated cavitated carious lesions and oral abscesses, 2) periodontal disease or  
99 periodontal pockets  $\geq 4$  mm, 3) the use of antibiotics or PPI within 2 months before the study, 4)  
100 previous diagnosis of a serious systemic diseases (such as diabetes, hypertension or cardiopathy) or any  
101 diseases affecting oral health (such as Sjogren's syndrome or any disease characterized by xerostomia),  
102 5) pregnancy of breastfeeding, and 6) smoking or alcohol drinking. The detailed clinical parameters of  
103 the 58 subjects are shown in Table S1.

104

### 105 **Salivary sampling**

106 Sampling was performed in the morning 2 hours after eating. Saliva samples were collected from  
107 each subject according to the Manual of Procedures for Human Microbiome Project  
108 ([http://hmpdacc.org/resources/tools\\_protocols.php](http://hmpdacc.org/resources/tools_protocols.php)), with minor modifications. Approximately 3-4 ml  
109 of non-stimulated saliva was collected in two sterile, labeled 2 mL Eppendorf tubes, which were  
110 immediately placed on ice. Within 3 hours of collection, samples were transported on ice and stored at  
111  $-80^{\circ}\text{C}$  until use (8).

112

### 113 **DNA Extraction and Pyrosequencing**

114 DNA was extracted from the saliva samples using the E.Z.N.A.® Soil DNA Kit (OMEGA, USA),  
115 following the manufacturer's instructions, and stored at  $-20^{\circ}\text{C}$  prior to further analysis. PCR  
116 amplification of the bacterial 16S rDNA hypervariable V3-V4 region was performed using the forward

117 primer 338F (5'-ACTCCTACGGGAGGCAGCA-3') and the reverse primer 806R  
118 (5'-GGACTACHVGGGTWTCTAAT-3'). Sample-specific 7-bp barcodes were incorporated into the  
119 primers for multiplex sequencing. Details of the barcodes are shown in Table S2. PCR amplification  
120 were performed on an ABI 2720 instrument (ABI, USA) with an initial denaturation at 98°C for 2  
121 minutes, followed by 25 cycles of denaturation (15s at 98°C), annealing (30s at 55°C), extension (30s at  
122 72°C), and ended with a final extension (5 min at 72°C). PCR amplicons were purified with Agencourt  
123 AMPure Beads (Beckman Coulter, Indianapolis, IN) and quantified using the Quant-iT PicoGreen  
124 dsDNA Assay Kit (Invitrogen, Carlsbad, CA, USA). Equimolar concentrations of purified amplicons  
125 were pooled in equal amounts. Subsequently, the paired-end 2×300 bp pyrosequencing was performed  
126 on the Illumina MiSeq platform with MiSeq Reagent Kit v3 (Illumina, USA), following the vendor's  
127 standard protocols.

128

## 129 **Sequence Analysis**

130 The Quantitative Insights Into Microbial Ecology (QIIME) pipeline was employed to process the  
131 sequencing data. Raw sequences were filtered to obtain high-quality sequences according to QIIME (9).  
132 The high-quality sequences were clustered into operational taxonomic units (OTUs) at 97% sequence  
133 identity by UCLUST (10). The representative sequences selected from each OTU were classified  
134 taxonomically by BLAST searching against the Human Oral Microbiome Database (HOMD), which  
135 provides a detailed record of the type, metabolism, and pathogenicity of oral bacteria (11). Then, an  
136 OTU table was further generated to record the OTU abundance of each sample and the taxonomic  
137 classification of these OTUs. Finally, to minimize the difference of sequencing depth across samples,



138 the OTU table was modified by removing OTUs containing less than 0.001% of total sequences across  
139 all samples for further analysis (12).

140

## 141 **Bioinformatics and Statistical Analysis**

142 Sequence data analyses were mainly performed using QIIME (version 1.8.0) and R packages  
143 (version 3.2.4). The alpha diversity analysis including Chao 1 richness estimator, Abundance-based  
144 Coverage Estimator (ACE) metric, Shannon diversity index, and Simpson index, were calculated at 97%  
145 identity using the QIIME (13). Ranked abundance curves were generated to compare both the richness  
146 and evenness of OTUs among samples. The beta diversity analysis including Nonmetric  
147 Multidimensional Scaling (NMDS), and unweighted UniFrac distances based principal coordinate  
148 analysis (PCoA), were performed using the R package to evaluate the similarity among various  
149 bacterial communities (14). The significance of differentiation of microbiota structure among groups  
150 was assessed by Adonis test (15). The taxonomy compositions and abundances were visualized by  
151 MEGAN (version 6.6.7) software (16). Linear discriminant analysis effect size (LEfSe) was used to  
152 compare the bacterial community structures between the samples from the patients with and without *H.*  
153 *pylori* infection, as well as before and after the eradication regimen, using the online Galaxy workflow  
154 framework (<http://huttenhower.sph.harvard.edu/galaxy/>) (17). Co-occurrence analysis among genera  
155 was performed among 50 most abundant genera. Correlations with  $|\text{RHO}| > 0.6$  and  $P < 0.01$  were  
156 visualized as co-occurrence network using Cytoscape (version 3.6.1) (18). Microbial functions were  
157 predicted by Phylogenetic investigation of communities by reconstruction of unobserved states  
158 (PICRUST), based on high-quality sequences, and aligned to the Kyoto Encyclopedia of Genes and

159 Genomes (KEGG) database (19).

160

161 **Data Access**

162 All raw sequences were deposited in the NCBI Sequence Read Archive under accession number

163 SRP167714.

164

165

## Results

### 166 Global Sequencing Data

167 A total of 2,812,659 high-quality sequences (representing 79% of the total sequences) were  
168 acquired from the 80 saliva samples, with an average of 35,158 sequences per sample (ranging from  
169 19,210 to 44,310). The average sequence length was 445 bp, with the maximum length being 548 bp  
170 and the shortest length being 136 bp (Figure S1). Clustering of all high-quality sequences at 97%  
171 identity resulted in 70,489 OTUs, which were BLAST-searched against the HOMD database for  
172 taxonomic assignments. After removing the low-credibility OTUs (together contributing only 6.7% of  
173 all sequences), a modified OTU table was obtained consisting of 95,812 OTUs with an average of  
174 1,198 OTUs per sample (ranging from 697 to 1,584).

175

### 176 Bacterial Abundance and Distribution

177 The bacterial distribution was characterized in terms of the relative taxonomic abundances. A  
178 total of 11 phyla, 21 classes, 36 orders, 68 families, 138 genera and 440 species were detected in the  
179 saliva samples. The taxonomic distributions of the predominant bacteria (relative abundance >1% of  
180 the total sequences) in subjects with and without *H. pylori* at different levels were shown in Figure 1.  
181 The 6 most abundant phyla were *Proteobacteria* (40.1% of the total sequences), *Firmicutes* (31.6%),  
182 *Bacteroidetes* (13.0%), *Actinobacteria* (7.4%), *Fusobacteria* (6.1%), and *TM7* (1.0%), together  
183 accounting for 99.2% of the total sequences. At genus level, saliva microbiota was dominated by  
184 *Neisseria*, *Streptococcus*, *Haemophilus*, *Veillonella*, and *Prevotella*, with average relative abundances  
185 of 20.2, 16.5, 10.5, 8.0, and 8.0%, respectively. The compositions in taxa of the microbial communities

186 according to the tested sample groupings are provide in Figure S2.

187

## 188 **Bacterial Diversity Analysis**

189 The saliva microbiota richness, measured by numbers of observed OTUs, was similar in  
190 uninfected subjects and infected subjects (Figure S3A). The alpha diversity indices of Chao1, ACE,  
191 Shannon, Inverse Simpson, Good's coverage, and Simpson's evenness are shown in Table 1. The  
192 Shannon diversity index was higher in uninfected subjects than in infected subjects, but there was no  
193 significant difference between groups by *t*-test (1417.58 vs. 1393.60,  $p>0.05$ ). Besides, the ACE  
194 richness index (1491.22 vs. 1465.97,  $p>0.05$ ), Chao 1 richness estimator (1417.58 vs. 1393.60,  $p>0.05$ ),  
195 and the Inverse Simpson diversity index (1.02 vs. 1.02,  $p>0.05$ ) was also higher in uninfected subjects,  
196 with no significant difference, indicating the similar bacterial diversity of *H. pylori* uninfected saliva  
197 compared to the infected subjects. Good's coverage estimator for each group was over 98%, indicating  
198 that the current sequencing depth was sufficient to saturate the bacterial diversity of saliva. In addition,  
199 Simpson's evenness index indicated that the bacterial-community distribution in two groups was  
200 uneven, which was also observed in the rank-abundance curve (Figure S4).

201

## 202 **Bacterial Community Structures**

203 To gain insights into the similarities in the bacterial community structures among uninfected and  
204 infected subjects, PCoA of beta diversity analysis was performed based on the unweighted UniFrac  
205 distances, which demonstrated different community structures among two groups (PERMANOVAR,  
206 pseudo-F: 1.49,  $p=0.033$ ). As shown in Figure 2A, the overall microbial composition of infected

207 subjects deviated from that of uninfected subjects. Furthermore, the results of NMDS based on the  
208 genus level classification exhibited clear segregations in community structures among groups (Figure  
209 S5A).

210

### 211 **Differential Microbiota Compositions**

212 There were significant differences in the community compositions among two groups. As shown  
213 in Figure 3, a cladogram representation of significantly different taxa among groups was performed by  
214 LEfSe. The microbial composition was significantly different at the genus level, with 16 significantly  
215 different genera among the two groups. *Acinetobacter*, *Ralstonia*, *Leptothrix*, *Sphingomonas*,  
216 *Ochrobactrum*, *Afiopia*, *Leptotrichia*, *Oribacterium*, and *Moryella* exhibited a relatively higher  
217 abundance in infected subjects, and can be considered *H. pylori*-enriched genera. *Alloprevotella*,  
218 *Aggregatibacter*, *Klebsiella*, *Leptotrichiaceae\_\_G\_1\_*, *Fusobacterium*, *Parvimonas*, and *Peptococcus*  
219 were relatively more abundant in uninfected subjects, which could be considered to be decreased in the  
220 infected group. These higher or lower expressed genera in infected subjects can be considered as *H.*  
221 *pylori*-associated genera (LAD >2, p < 0.05).

222

### 223 **Eradication therapy for *H. pylori* partially changed salivary microbiota**

224 To determine the effects of *H. pylori* eradication therapy on saliva microbial composition, saliva  
225 samples from a subgroup of *H. pylori* infected subjects (n=22), were collected before (pre-eradicated  
226 group) and 2 months after treatment; saliva collected after successful eradication were classified into  
227 the eradicated group. The within-individual diversity in the samples from eradicated group was lower

228 than pre-eradicated group (Figure S3B). The Shannon diversity index, ACE richness index, and Chao 1  
229 richness estimator were higher in pre-eradicated subjects than in eradicated subjects, with a significant  
230 difference between groups by *t*-test (Shannon  $p=0.015$ , ACE  $p=0.003$ , Chao 1  $p=0.002$ ), indicating  
231 significant alteration in the within-individual diversity in samples from eradicated subjects compared to  
232 their baseline samples (Table 2).

233 The beta diversity using unweighted UniFrac showed significant differences in the overall  
234 microbial composition between pre-eradicated and eradicated groups (PERMANOVAR, pseudo-F: 3.34,  
235  $p=0.001$ ) (Figure 2B). The NMDS also exhibited clear segregations in community structures among  
236 groups (Figure S5B).

237 The relative difference of *H. pylori*-associated taxa was compared before and after eradication by  
238 LEFse analysis (Figure S6). Among the *H. pylori*-enriched genera, *Ralstonia*, *Leptotrichia*,  
239 *Sphingomonas*, *Leptothrix*, *Oribacterium*, and *Acinetobacter* increased after the eradication, while  
240 *Ochrobactrum* decreased after the successful eradication ( $p<0.05$ , paired Wilcoxon rank-sum test). Of  
241 the genera that decreased in infected subjects, *Alloprevotella*, *Aggregatibacter*,  
242 *Leptotrichiaceae\_\_G\_1\_*, *Parvimonas*, and *Fusobacterium* decreased after the eradication ( $p<0.05$ ,  
243 paired Wilcoxon rank-sum test). Besides, we found that at phyla level, *Fusobacteria* increased after *H.*  
244 *pylori* eradication.

245

#### 246 ***Helicobacter species in the oral cavity***

247 *H. pylori* was detected in 38 out of 80 saliva samples, occupying 0.0139% of all the total  
248 sequences (Figure 4). 12 of the 34 subjects in infected subjects (35.3%), 11 of 24 subjects in the

249 uninfected group (45.8%), and 15 of 22 subjects in the eradicated group (68.2%) were found to possess  
250 *H. pylori* in the oral cavity, respectively, ( $p=0.054$ ). The *H. pylori* signature was present in the saliva of  
251 subjects with negative  $^{13}\text{C}$ -UBT, RUT, and in *H. pylori* infected individuals after successful *H. pylori*  
252 eradication. We've also compared the prevalence of *H. pylori* both before and after *H. pylori*  
253 eradication. Pre-eradication 7 subjects has positive saliva and 15 were negative. In 6 of the 7 with *H.*  
254 *pylori* pretreatment it was no longer detected by PCR after eradication. Interestingly, 9 in 15 subjects  
255 who were *H. pylori* negative before eradication had it detected post *H. pylori* eradication whereas 6  
256 remained free of *H. pylori* after eradication.

257

## 258 **Co-occurrence Network Analysis and Function Predictions**

259 Co-occurrence analysis was used to discern relationships among the saliva microbiota at the genus  
260 level. As shown in the network diagram for the 50 most abundant genera (Figure S7), 12 genera  
261 displayed positive associations, and 1 genera displayed a negative association. Among them,  
262 *Atopobium* and *Solobacterium* exhibited a high degree of linkages with other genera. High rho values  
263 were found for the *Atopobium-Megasphaera* (0.83), *Filifactor-Treponema* (0.75), and  
264 *Atopobium-Prevotella* (0.74) pairs. Besides, *Oribacterium*, *Acinetobacter*, and *Ralstonia* exhibited a  
265 positive association (0.68).

266 To predict the functions of saliva bacterial community, PICRUSt analysis was performed based on  
267 the 16S rDNA composition data of each sample (Figure S8). A total of 41 metabolic functions were  
268 predicted in all samples with the most enrichment in membrane transport (11.8%), replication and  
269 repair (9.7%), amino acid metabolism (9.4%), carbohydrate metabolism (9.2%), translation (6.6%), and

270 energy metabolism (5.8%).

271

272



273

## Discussion

274

275

276

277

278

279

280

281

282

283

284

285

286

287

288

289

290

291

292

293

A comprehensive and thorough investigation of the bacterial diversity of saliva microbiota is essential for understanding the how or whether *H. pylori* infection alters the salivary saliva microbiota. The technology of high-throughput pyrosequencing has provided new cognizance of the structures and compositions of microbiota communities.

By comparing the alpha diversity indexes we found that the bacterial diversity in saliva was similar among the *H. pylori* uninfected and *H. pylori* infected people. Our study is consistent with the notion that *H. pylori* in the stomach has little or no effect on the bacterial diversity of the oral cavity (20). The Shannon diversity index, ACE richness index, and Chao 1 richness estimator all declined after eradication of *H. pylori* compared to the baseline samples ( $p < 0.05$ ), which was consistent with the prior studies that use of PPIs and antibiotics may affect the oral microbiome (21, 22).

According to the beta diversity analysis based on the unweighted UniFrac distances, the community structures of saliva microbiota were different in *H. pylori* uninfected and infected individuals, which is contrary to the results of Christian's study (20). Samples from the *H. pylori* infected subjects tended to cluster together, while the microbiota in the uninfected subjects appeared to be more variable suggesting that gastric *H. pylori* infection may affect oral bacterial components. Clear segregations by the PCoA and NMDS analysis among individuals before and after *H. pylori* eradication therapy demonstrated that successful eradication or eradication therapy changed the oral bacterial components to some extent.

In addition to the presence of different bacterial members, the abundance of some bacteria also differed significantly among groups. We clearly observed that some bacteria in the saliva of *H. pylori*

294 infected individuals showed a significantly reduced abundance, among which *Aggregatibacter*,  
295 *Klebsiella*, *Fusobacterium*, and *Parvimonas* were pathogenic bacteria. *Aggregatibacter* is a dominant  
296 etiology of infective endocarditis (23). *Klebsiella* and *Fusobacterium* can lead to liver abscess,  
297 pneumonia, and meningitis (24). *Parvimonas* has been isolated as a causative agent in a variety of  
298 systemic infections, including meningitis, septic arthritis, chest wall abscess, spondylodiscitis,  
299 empyema, endocarditis, hepatic abscesses, and brain abscess (25). However, the abundance of other  
300 bacteria significantly increased in saliva of *H. pylori* infected individuals, most of which were oral  
301 microbiota composition, including *Sphingomonas*, *Ochrobactrum*, *Afipia*, *Leptotrichia*, *Oribacterium*,  
302 and *Moryella*, except *Acinetobacter* causing infectious diseases like pneumonia and urinary tract  
303 infections (26), and *Leptotrichia*, a potential cariogenic genera (27). While in Christian's study, no  
304 significant difference in oral communities between *H. pylori* infected and uninfected individuals were  
305 detected at genus level (20), this may be due to the different target sequencing region of 16s rDNA,  
306 sample size, or geographic location. Interestingly, most *H. pylori*-enriched genera increased after the  
307 eradication, including *Ralstonia*, *Leptotrichia*, *Sphingomonas*, *Leptothrix*, *Oribacterium*, and  
308 *Acinetobacter*. The exception was *Ochrobactrum*. However, genera low expressed in *H. pylori* infected  
309 saliva experienced a further decline after *H. pylori* eradication therapy, including *Alloprevotella*,  
310 *Aggregatibacter*, *Leptotrichiaceae\_\_G\_1\_*, *Parvimonas*, and *Fusobacterium*, most of which are  
311 pathogenic bacteria. The presence of *Ralstonia* positively correlated with the presence of *Oribacterium*  
312 and *Acinetobacter*, each of which increased in patients with *H. pylori* after successful eradication. Our  
313 study suggests that *H. pylori* infection may change the saliva microbiota by reducing the number of  
314 conditional pathogenic bacteria and increasing the number of normal bacteria composition. After *H.*

315 *pylori* eradication therapy, most conditional pathogenic genera in saliva decline while most symbiotic  
316 bacteria become more abundant.

317 Although the clinical significance of these alterations is not known, *H. pylori* unexpectedly and  
318 clearly altered the oral microbiota composition. Previous studies have reported acid inhibition in upper  
319 gastric tract may have an effect on the oral microbiome leading to alterations in the microbiota (28). In  
320 addition, changes in gastric pH could also lead to an alteration in the pH of oral cavity (29). *H. pylori*  
321 generates large amount of urease, an enzyme which decomposes urea into ammonia and carbon dioxide  
322 and transiently reduce the acidic environment in the stomach (30). We proposed that *H. pylori* likely  
323 changed the community and structure of oral microbiota through changes in the acidic environment in  
324 stomach. The use of PPIs during the eradication therapy would further inhibit the pH in stomach,  
325 leading to further alteration in saliva microbiota, which can partially explain why genera enriched in *H.*  
326 *pylori* infected individuals would further increase and genera low expressed in *H. pylori* infected  
327 individuals would decline after successful eradication. Although the precise mechanism has yet to be  
328 clarified, to our knowledge this is the first study to clearly show oral microbiota alterations as a result  
329 of *H. pylori* infection in a cohort of subjects. Additional studies to investigate these possible causal  
330 relationships would likely provide interesting findings. Besides, by PICRUST analysis, we predicted  
331 that the saliva bacterial functions mainly enriched in membrane transport, replication and repair, amino  
332 acid metabolism, carbohydrate metabolism, translation, and energy metabolism.

333 Using amplicon pyrosequencing of 16S rDNA V3-V4 hypervariable regions we detected *H. pylori*  
334 in the oral cavity of almost half of the subjects regardless of whether they had gastric infection with *H.*  
335 *pylori*. Subjects who did not have *H. pylori* in the oral cavity before eradication surprisingly had *H.*

336 *pylori* detected in saliva samples after *H. pylori* eradication therapy. Clearly, using these techniques the  
337 prevalence of *H. pylori* in oral cavity is not clearly associated with colonization status in the stomach  
338 which is not consistent with the notion that the oral cavity represents a secondary site for *H. pylori*  
339 colonization (31). The gastric and oral mucosa differ markedly. For example, of the two only the gastric  
340 mucosa expresses Lewis<sup>b</sup> antigen, an ABO blood group antigen, which enables adherence of *H. pylori*  
341 to the epithelial surfaces. It has been proposed that *H. pylori* is a passerby in oral cavity, rather than a  
342 colonizer and it may be also be included in the material in gastroesophageal reflux. The natural history  
343 of *H. pylori* infection has been that after *H. pylori* eradication from the stomach, gastric reinfection is  
344 rare and when it occurs early it can often be shown to be recrudescence (the same genotype) whereas  
345 later reinfections are most often reinfection with a different genotype (32). The hypothesis that *H.*  
346 *pylori* was a common passerby rather than a colonizer would partly explain why recurrences are most  
347 common in areas with poor sanitation and a high prevalence of *H. pylori* and rare in developed  
348 countries whose frequency of *H. pylori* infection had become much lower than that of poor regions.

349

## Strengths and Limitations

350

351 Our study showed that *H. pylori* infection and the eradication treatment resulted in alterations of  
352 oral microbiota. However, there were limitations to our study. The technique of high-throughput  
353 pyrosequencing we used in our study could detect the microbiota at genus level precisely.  
354 Metagenomics sequencing was not able to be used to detect *H. pylori*-specific virulence factors such as  
355 VacA, CagA, OipA, etc. or full sequence (33). One issue with the interpretation is that there was no  
356 control sample of *H. pylori* uninfected individuals receiving the same antimicrobial therapy which  
357 precluded determination about whether the presence of *H. pylori*, the antimicrobial therapy, or both  
358 were dominant factors in changing the within-individual diversity of the oral cavity.

359

360

361

## Conclusions

362

Our study showed that bacterial diversity was similar in *H. pylori* infected and uninfected people.

363

Eradication therapy was associated with a decline the bacterial diversity in oral cavity. Both *H. pylori*

364

infection and eradication therapy caused alterations in community and structure of the oral microbiota.

365

*H. pylori* is found commonly in the oral cavity with no clear relation to *H. pylori* infection of the

366

stomach.

## Acknowledgments

367

368       This study was financially supported by National Natural Science Foundation of China (81170355  
369 and 81370592) and Clinical Research Center, Shanghai Jiao Tong University School of Medicine. We  
370 acknowledged Shanghai Personal Biotechnology Co., Ltd. For their kind help in 454 pyrosequencing  
371 and bioinformatics analysis. All authors don't have any potentially conflicting interests.

372

373

## Reference

- 374 1. Malfertheiner P, Megraud F, O'Morain CA. 2017. Management of Helicobacter pylori infection-the  
375 Maastricht V/Florence Consensus Report. Gut 66(1):6-30.
- 376 2. David Bui, Heidi E. Brown, Robin B. Harris, Eyal Oren. 2016. Serologic Evidence for Fecal–Oral  
377 Transmission of Helicobacter pylori. Am J Trop Med Hyg Jan 6; 94(1): 82–88.
- 378 3. John KC Yee. 2016. Helicobacter pylori colonization of the oral cavity: A milestone discovery. World  
379 J Gastroenterol Jan 14; 22(2): 641–648.
- 380 4. Moodley,A., Wood,N.H., Shangase. 2013. The relationship between periodontitis and diabetes: a  
381 brief review. SADJ 68(6):260, 262.
- 382 5. Jianye Zhou, Nan Jiang, Zhenzhen Wang, Longqing Li, Jumei Zhang, Rui Ma, Hongbing Nie, and  
383 Zhiqiang Li. 2017. Influences of pH and Iron Concentration on the Salivary Microbiome in Individual  
384 Humans with and without Caries. Applied and Environmental Microbiology 83(1-4).
- 385 6. Ciric,L., Pratten,J., Wilson,M., Spratt,D. 2010. Development of a novel multi-triplex qPCR(q) PCR  
386 method for the assessment of bacterial community structure in oral populations. Environmental  
387 Microbiology Reports 2(6):770-774.
- 388 7. Chen, H., Jiang, W. 2014. Application of high-throughput sequencing in understanding human oral  
389 microbiome related with health and disease. Frontiers in Microbiology 5(508):508.
- 390 8. Sakiyama Y, Kato R, Inoue S, Suzuki K, Itabe H, Yamamoto M. 2010. Detection of oxidized  
391 low-density lipoproteins in gingival crevicular fluid from dental patients. Journal of Periodontal  
392 Research 45(2):216-222.
- 393 9. Kuczynski J, Stombaugh J, Walters WA, González A, Caporaso JG, Knight R. 2011. Using QIIME to



- 394 analyze 16S rRNA gene sequences from microbial communities. *Current protocols in bioinformatics* /  
395 editorial board, Andreas D. Baxevanis Chapter 10(7):Unit 10.7.
- 396 10. Edgar, R. C. 2010. Search and clustering orders of magnitude faster than BLAST. *Bioinformatics*  
397 26(19):2460-2461.
- 398 11. NIH/National Institute of Dental and Craniofacial Research. 2008. Scientists Launch first  
399 comprehensive database of human oral microbiome. *ScienceDaily*.
- 400 12. Bokulich, N.A., Subramanian, S., Faith, J.J., Dirk Gevers, Jeffrey I Gordon, Rob Knight, David A  
401 Mills, J Gregory Caporaso. 2012. Quality-filtering vastly improves diversity estimates from Illumina  
402 amplicon sequencing. *Nature Methods* 10(1):57-59.
- 403 13. Paul D, Kumbhare SV, Mhatre SS, Chowdhury SP, Shetty SA, Marathe NP, Bhute S, Shouche YS.  
404 2016. Exploration of microbial diversity and community structure of lonar lake: the only hypersaline  
405 meteorite crater lake within basalt rock. *Frontiers in Microbiology* 6.
- 406 14. Ramette, A. 2010. Multivariate analyses in microbial ecology. *Fems Microbiology Ecology*  
407 62(2):142-160.
- 408 15. Warton, D. I., S. T. Wright, Y. Wang. 2012. Distance-based multivariate analyses confound location  
409 and dispersion effects. *Methods in Ecology and Evolution* 3(1): 89-101.
- 410 16. Francesco Asnicar, George Weingart, Timothy L. Tickle, Curtis Huttenhower, Nicola Segata. 2015.  
411 Compact graphical representation of phylogenetic data and metadata with GraPhlAn. *PeerJ* 3: e1029.
- 412 17. Nicola Segata, Jacques Izard, Levi Waldron, Dirk Gevers, Larisa Miropolsky, Wendy S Garrett,  
413 Curtis Huttenhower. 2011. Metagenomic biomarker discovery and explanation. *Genome Biology*  
414 12(6):R60.

- 415 18. Paul Shannon, Andrew Markiel, Owen Ozier, Nitin S. Baliga, Jonathan T. Wang, Daniel Ramage,  
416 Nada Amin, Benno Schwikowski, Trey Ideker. 2003. Cytoscape: a software environment for integrated  
417 models of biomolecular interaction networks. *Genome Res* 13, 2498–2504.
- 418 19. Morgan G I Langille, Jesse Zaneveld, J Gregory Caporaso, Daniel McDonald, Dan Knights, Joshua  
419 A Reyes, Jose C Clemente, Deron E Burkepille, Rebecca L Vega Thurber, Rob Knight, Robert G Beiko.  
420 2013. Curtis Huttenhower Predictive functional profiling of microbial communities using 16S rRNA  
421 marker gene sequences. *Nature Biotechnology* 31(9):814-821.
- 422 20. Christian Schulz, Kerstin Schütte, Nadine Koch, Ramiro Vilchez-Vargas, Melissa L Wos-Oxley,  
423 Andrew P A Oxley, Marius Vital, Peter Malferttheiner, Dietmar H Piepe. 2018. The active bacterial  
424 assemblages of the upper GI tract in individuals with and without *Helicobacter* infection. *Gut*  
425 67:216–225.
- 426 21. Shira R. Abeles, Melissa Ly, Tasha M. Santiago-Rodriguez, David T. 2015. Effects of Long Term  
427 Antibiotic Therapy on Human Oral and Fecal Viromes. *PLoS One* 10(8): e0134941.
- 428 22. Tsuyoshi Mishiro, Kentaro Oka, Yasutoshi Kuroki, Motomichi Takahashi, Kasumi Tatsumi, Tsukasa  
429 Saitoh, Hiroshi Tobita, Norihisa Ishimura, Shuichi Sato, Shunji Ishihara, Joji Sekine, Koichiro Wada,  
430 Yoshikazu Kinoshita. 2018. Oral microbiome alterations of healthy volunteers with proton pump  
431 inhibitor. *J Gastroenterol Hepatol* May;33(5):1059-1066.
- 432 23. Niels Nørskov-Lauritsen. 2014. Classification, Identification, and Clinical Significance of  
433 *Haemophilus* and *Aggregatibacter* Species with Host Specificity for Humans. *Clin Microbiol Rev* Apr;  
434 27(2): 214–240.
- 435 24. Alyssa S. Shon, Rajinder P.S. Bajwa, Thomas A. Russo. 2013. Hypervirulent (hypermucoviscous)

- 436 *Klebsiella pneumoniae*: A new and dangerous breed. *Virulence* Feb 15; 4(2): 107–118.
- 437 25. Chaucer B, Smith N, Beatty D, Yadav M. 2018. Multiple Hepatic Abscess from *Parvimonas micra*:  
438 An Emerging Gastrointestinal Microbe. *ACG Case Rep J* Sep 26;5:e70.
- 439 26. Darren Wong, Travis B. Nielsen, Robert A. Bonomo, Paul Pantapalangkoor, Brian Luna, Brad  
440 Spellberg. 2017. Clinical and Pathophysiological Overview of *Acinetobacter* Infections: a Century of  
441 Challenges. *Clin Microbiol Rev* Jan; 30(1): 409–447.
- 442 27. D. Belstrøm, M.L. Sembler-Møller, M.A. Grande, N. Kirkby, S.L. Cotton, B.J. Paster, S. Twetman,  
443 P. Holmstrup. 2018. Impact of Oral Hygiene Discontinuation on Supragingival and Salivary  
444 Microbiomes. *JDR Clin Trans Res* Jan;3(1):57-64.
- 445 28. Johnstone J, Nerenberg K, Loeb M. 2010. Meta-analysis: proton pump inhibitor use and the risk of  
446 community-acquired pneumonia. *Alimentary Pharmacology & Therapeutics* 31(11):1165-1177.
- 447 29. JS Jin, M Touyama, S Yamada, T Yamazaki, Y Benno. 2014. Alteration of a human intestinal  
448 microbiota under extreme life environment in the Antarctica. *Biological & Pharmaceutical Bulletin*  
449 37(12):1899-906.
- 450 30. Kentaro Sugano, Jan, Tack, Ernst J Kuipers, David Y Graham, Emad M El-Omar, Soichiro Miura ,  
451 Ken Haruma, Masahiro Asaka, Naomi Uemura, Peter Malfertheiner. 2015. Kyoto global consensus  
452 report on *Helicobacter pylori* gastritis. *Gut* 64:1353–67.
- 453 31 Zou QH, Li RQ. 2011. *Helicobacter pylori* in the oral cavity and gastric mucosa: a meta-analysis. *J*  
454 *Oral Pathol Med* 40: 317-324.
- 455 32. APA Kim, S. Y., Hyun, J. J., Jung, S. W., Koo, J. S., Yim, H. J., Lee, S.W.. 2014. *Helicobacter pylori*  
456 recurrence after first- and second-line eradication therapy in Korea: the problem of recrudescence or

457 reinfection. *Helicobacter* Jun;19 (3):202-6.

458 33. Mitsushige Sugimoto, Jeng-Yih Wu, Suhaib Abudayyeh, Jill Hoffman, Hajer Brahem, Khaldun

459 Al-Khatib, Yoshio Yamaoka, and David Y. Graham. 2009. Unreliability of Results of PCR Detection of

460 *Helicobacter pylori* in Clinical or Environmental Samples. *Journal of Clinical Microbiology*

461 47(3):738-42.

462

## Tables

463 **Table 1: Alpha diversity indices for saliva bacteria in each group at 97% identity.**

464

| Group    | Chao1   |        | ACE     |        | Shannon |      | Inverse Simpson |      | Coverage |      | Simpson even |      |
|----------|---------|--------|---------|--------|---------|------|-----------------|------|----------|------|--------------|------|
|          | Mean    | SE     | Mean    | SE     | Mean    | SE   | Mean            | SE   | Mean     | SE   | Mean         | SE   |
| <b>N</b> | 1417.58 | 195.47 | 1491.22 | 210.41 | 7.94    | 0.36 | 1.02            | 0.01 | 0.98     | 0.01 | 0.05         | 0.02 |
| <b>P</b> | 1393.60 | 182.57 | 1465.97 | 196.06 | 7.89    | 0.42 | 1.02            | 0.01 | 0.98     | 0.00 | 0.05         | 0.01 |

465

466 SE, Standard Error. N=uninfected group, P=infected group.

467 No statistically significant difference was observed in all index among N group and P group ( $p > 0.05$ ,

468 Student's t-test).

469

470 **Table 2: Alpha diversity indices for saliva bacteria in each group at 97% identity.**

471

| Group     | Chao1    |        | ACE      |        | Shannon |      | Inverse Simpson |      | Coverage |      | Simpson even |      |
|-----------|----------|--------|----------|--------|---------|------|-----------------|------|----------|------|--------------|------|
|           | Mean     | SE     | Mean     | SE     | Mean    | SE   | Mean            | SE   | Mean     | SE   | Mean         | SE   |
| <b>PE</b> | 1350.56* | 200.94 | 1421.26* | 215.43 | 7.83*   | 0.49 | 1.02            | 0.01 | 0.98     | 0.00 | 0.05         | 0.02 |
| <b>E</b>  | 1143.95* | 215.08 | 1206.85* | 234.63 | 7.44*   | 0.53 | 1.03            | 0.02 | 0.98     | 0.00 | 0.05         | 0.02 |

472

473 SE, Standard Error. Asterisk indicates significant difference ( $p < 0.05$ , Student's t-test). PE=pre-eradicated

474 group, E=eradicated group.

475 \*Chao 1, \*ACE, and \*Shannon index between PE and E was statistically significant different ( $p < 0.05$ ).

476

477

## Figure Legend

478 **Figure 1: Distribution of the predominant bacteria at different taxonomic levels (phylum, class,**  
479 **order, family, and genus).** The predominant taxa (>1% relative abundance) in each level are shown.  
480 N=uninfected group, P=infected group, E=eradicated group.

481

482 **Figure 2: Principal coordinate analysis (PCoA) of unweighted UniFrac analysis.** (A) PCoA  
483 analysis demonstrated that subjects of P group were significantly different from N group  
484 (PERMANOVAR, pseudo-F: 1.49, p=0.033). N=uninfected group, P=infected group. (B) PCoA  
485 analysis showed that the overall microbial composition showed significant difference between PE and  
486 E group (PERMANOVAR, pseudo-F: 3.34, p=0.001). E=eradicated group, N=uninfected group,  
487 PE=pre-eradicated group.

488

489 **Figure 3: Comparison of microbial variations at the genus level, using the LEfSe online tool.** (A)  
490 Histogram of the LDA scores for differentially abundant features among groups. The threshold on the  
491 logarithmic LDA score for discriminative features was set to 2.0. N=uninfected group, P=infected  
492 group. (B) Cladogram for taxonomic representation of significantly differences among groups.  
493 Differences are represented in the color of the most abundant taxa (red indicating P group, green  
494 indicating N group, and white indicating non-significant). N=uninfected group, P=infected group.

495

496 **Figure 4: H. pylori in oral cavity of three groups.** Red represent P group, yellow represent N group,  
497 and blue represent E group. N=uninfected group, P=infected group, E=eradicated group.



## Supporting Information

499

500 **Table S1 Clinical parameters of the 58 subjects.** N=uninfected group, P=infected group,  
501 PE=pre-eradicated group, E=eradicated group.

502

503 **Table S2: Modified OTU table at 97% identity.** N=uninfected group, P=infected group, E=eradicated  
504 group.

505

506 **Figure S1: Length distribution of sequences determined by 454 pyrosequencing.**

507

508 **Figure S2: A classification tree showing bacterial abundance by MEGAN.** The taxonomy  
509 compositions and abundances were visualized by MEGAN (version 6.6.7). The larger the area of the  
510 colored pie chart, the greater the bacterial abundance. Different colors represent different groups, and  
511 the larger the colored sectorial area at a branch, the more the corresponding group contributed to the  
512 bacterial abundance. N=uninfected group, P=infected group, E=eradicated group.

513

514 **Figure S3: Alpha diversity (observed species number) among groups.** (A) N group and P group  
515 showed similar alpha diversity ( $p > 0.05$ ). N=uninfected group, P=infected group. (B) The observed  
516 species in E group were significantly lower than that of PE group and N group ( $p < 0.01$ ); One asterisk  
517 indicates significant differences ( $p < 0.05$ , Student's t-test), two asterisk indicates  $p < 0.01$ , three asterisk  
518 indicates  $p < 0.001$ . N=uninfected group, PE=pre-eradicated group, E=eradicated group.

519



520 **Figure S4: Rank abundance curves for all OTUs.** N=uninfected group, P=infected group,  
521 E=eradicated group.

522

523 **Figure S5: Nonmetric Multidimensional Scaling (NMDS) based on unweighted UniFrac distances**  
524 **at the OUT level at 97% identity.** Each sample is represented by a dot. (A) The samples formed  
525 well-separated clusters corresponding to the two groups, suggesting that the bacterial structures in N  
526 group and P group were different. N=uninfected group, P=infected group. Red squares represent the N  
527 samples. Blue triangles represent the P samples. (B) Blue triangles represent the N samples. Red circles  
528 represent the E samples. The samples formed well-separated clusters corresponding to the three groups,  
529 suggesting that the bacterial structures in E group, PE group, and N group were different. N=uninfected  
530 group, PE=pre-eradicated group, E=eradicated group.

531

532 **Figure S6: Comparison of microbial variations at the genus level, using the LEfSe online tool.** (A)  
533 Histogram of the LDA scores for differentially abundant features among groups. The threshold on the  
534 logarithmic LDA score for discriminative features was set to 2.0. N=uninfected group,  
535 PE=pre-eradicated group, E=eradicated group. (B) Cladogram for taxonomic representation of  
536 significantly differences among groups. Differences are represented in the color of the most abundant  
537 taxa (red indicating N group, blue indicating PE group, green indicating E group, and white indicating  
538 non-significant). N=uninfected group, PE=pre-eradicated group, E=eradicated group.

539

540 **Figure S7: A network diagram of dominant genera showing associations among the 50 most**

541 **abundant genera.** Red line represent positive associations, and green line represent negative  
542 associations.

543

544 **Figures S8: Bacterial function prediction by PICRUSt analysis.** N=uninfected group, P=infected  
545 group, E=eradicated group.

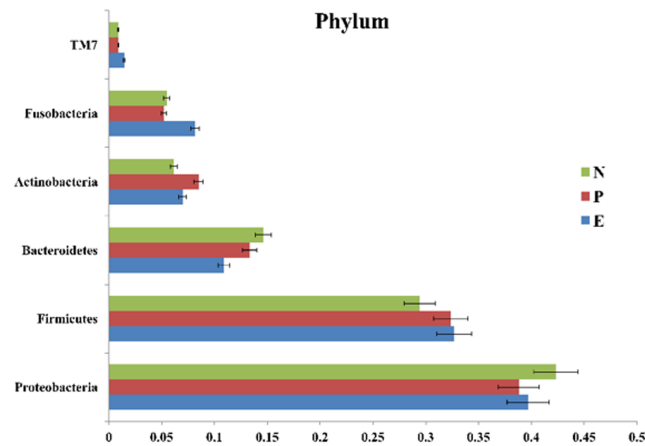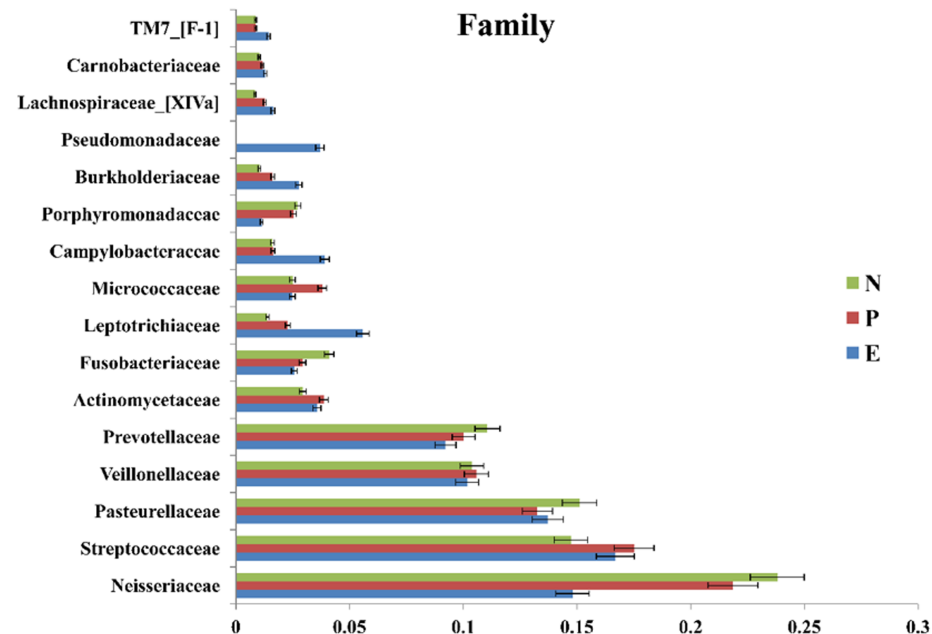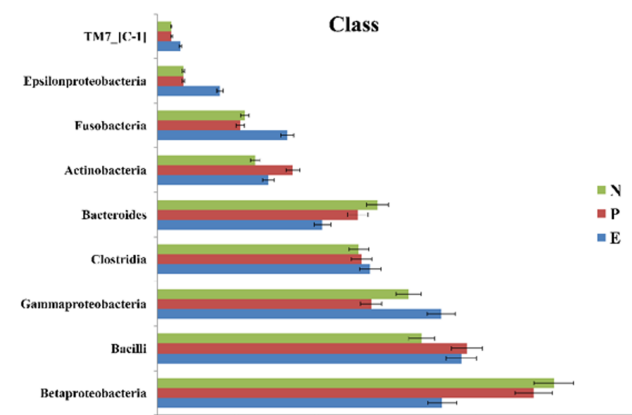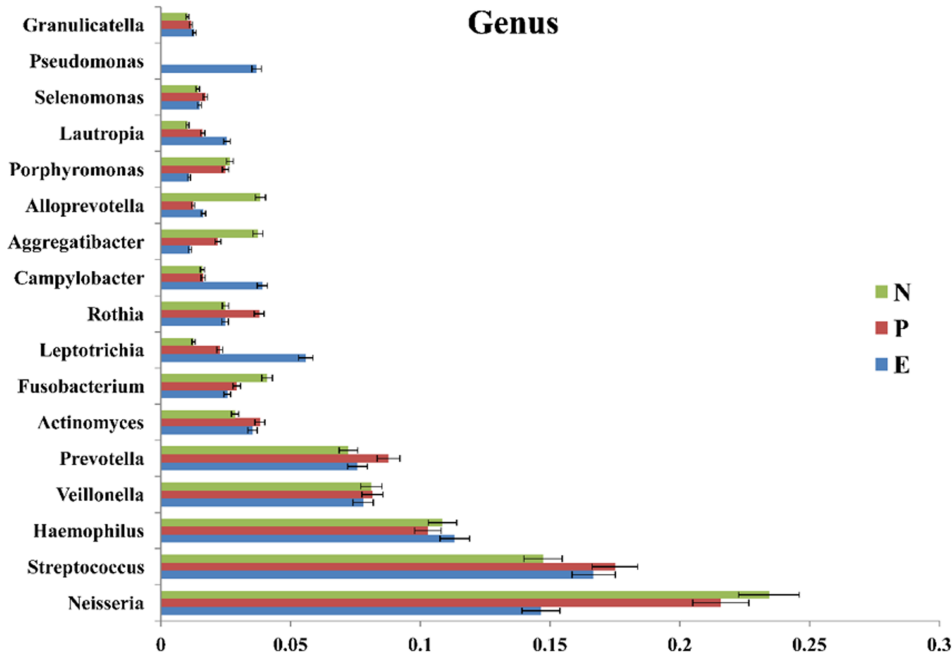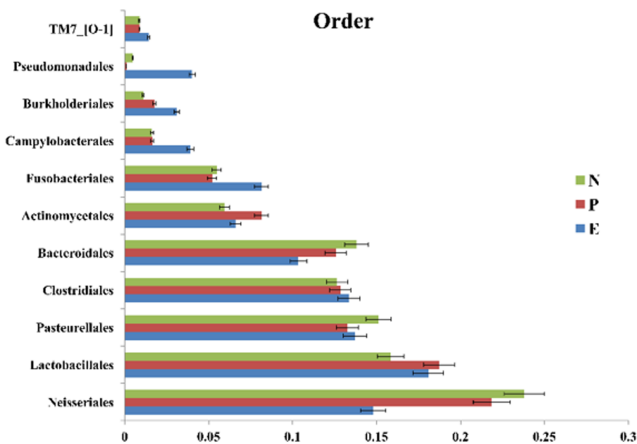

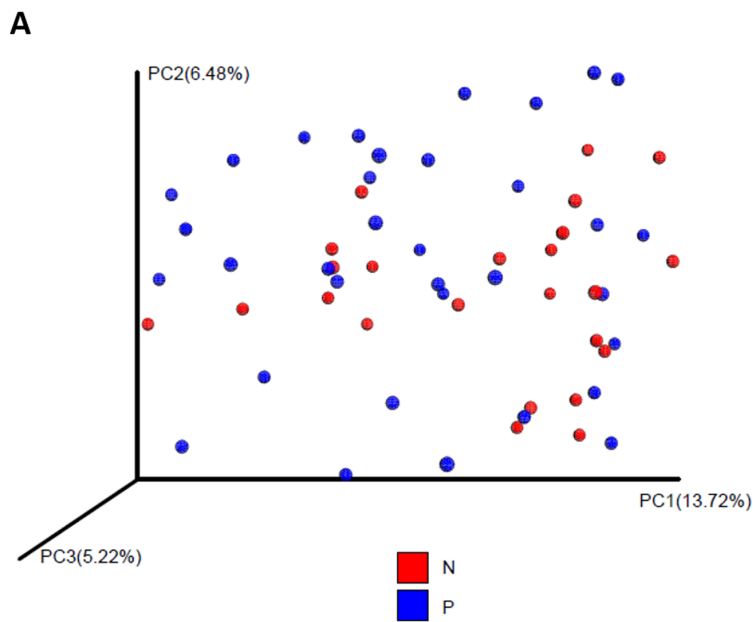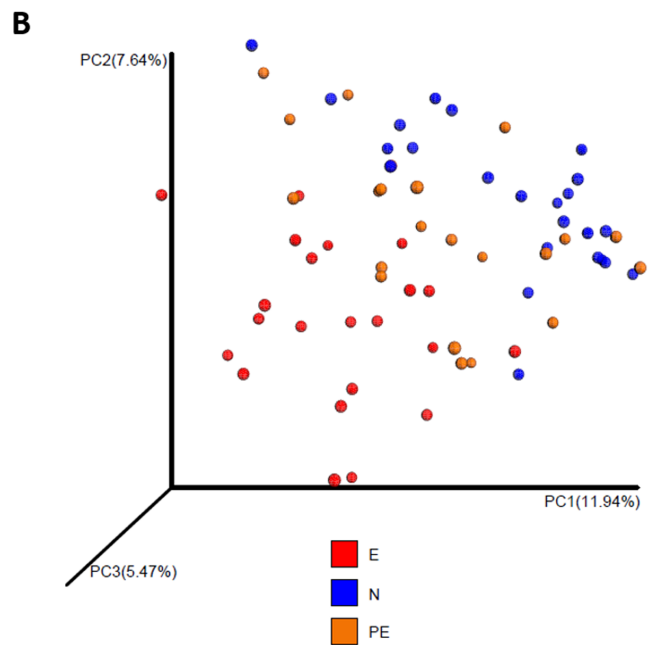

A

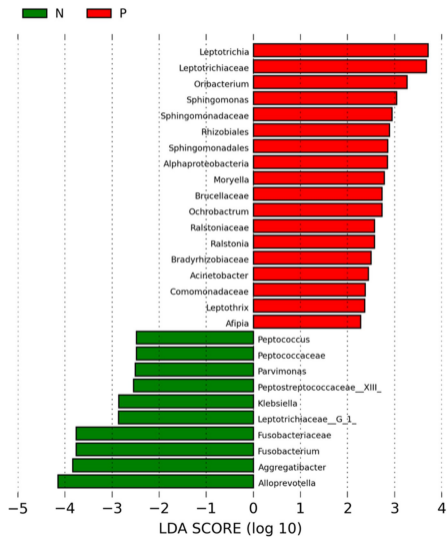

B

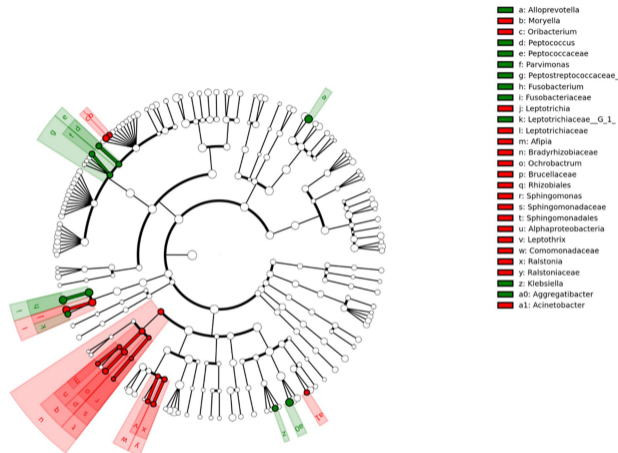

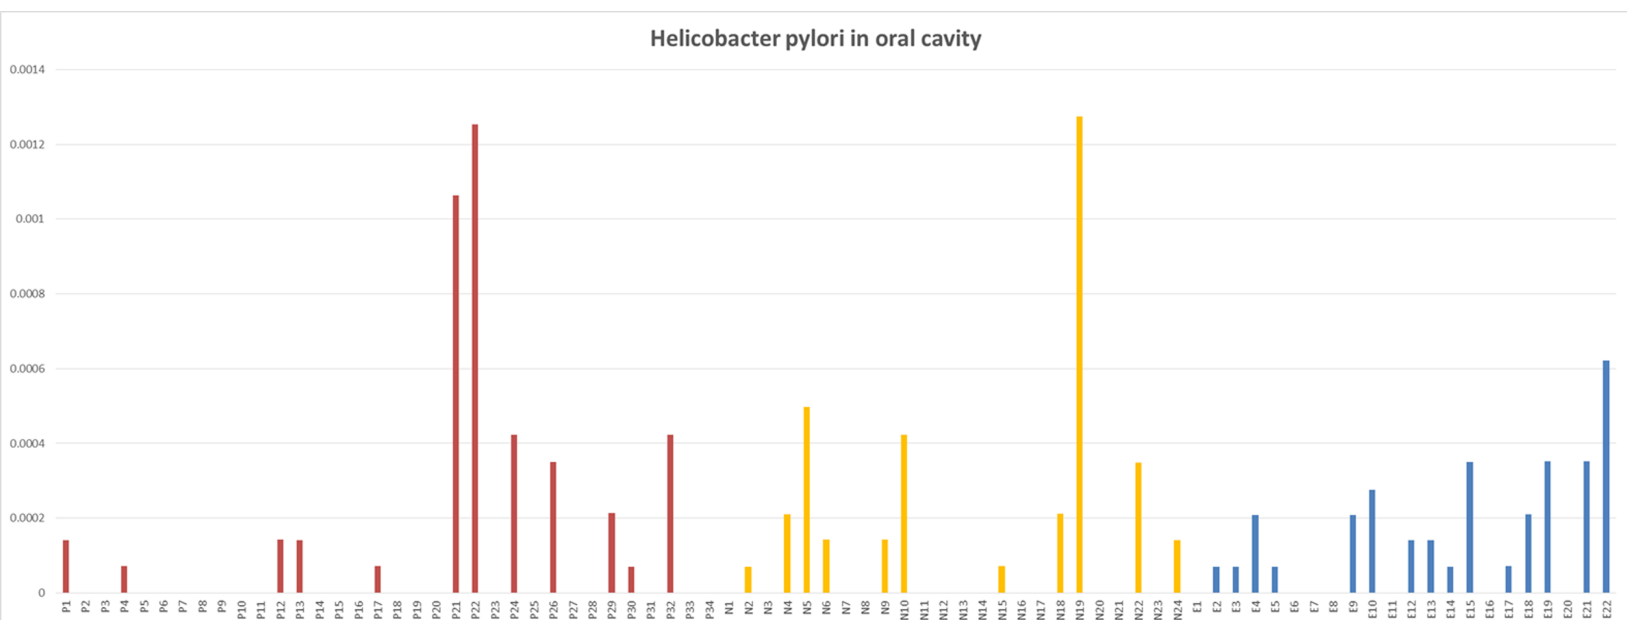

**Table 1: Alpha diversity indices for saliva bacteria in each group at 97% identity.**

| Group    | Chao1   |        | ACE     |        | Shannon |      | Inverse Simpson |      | Coverage |      | Simpson even |      |
|----------|---------|--------|---------|--------|---------|------|-----------------|------|----------|------|--------------|------|
|          | Mean    | SE     | Mean    | SE     | Mean    | SE   | Mean            | SE   | Mean     | SE   | Mean         | SE   |
| <b>N</b> | 1417.58 | 195.47 | 1491.22 | 210.41 | 7.94    | 0.36 | 1.02            | 0.01 | 0.98     | 0.01 | 0.05         | 0.02 |
| <b>P</b> | 1393.60 | 182.57 | 1465.97 | 196.06 | 7.89    | 0.42 | 1.02            | 0.01 | 0.98     | 0.00 | 0.05         | 0.01 |

SE, Standard Error. N=uninfected group, P=infected group.

No statistically significant difference was observed in all index among N group and P group

( $p > 0.05$ , Student's t-test).

**Table 2: Alpha diversity indices for saliva bacteria in each group at 97% identity.**

| Group | Chao1    |        | ACE      |        | Shannon |      | Inverse Simpson |      | Coverage |      | Simpson even |      |
|-------|----------|--------|----------|--------|---------|------|-----------------|------|----------|------|--------------|------|
|       | Mean     | SE     | Mean     | SE     | Mean    | SE   | Mean            | SE   | Mean     | SE   | Mean         | SE   |
| PE    | 1350.56* | 200.94 | 1421.26* | 215.43 | 7.83*   | 0.49 | 1.02            | 0.01 | 0.98     | 0.00 | 0.05         | 0.02 |
| E     | 1143.95* | 215.08 | 1206.85* | 234.63 | 7.44*   | 0.53 | 1.03            | 0.02 | 0.98     | 0.00 | 0.05         | 0.02 |

SE, Standard Error. Asterisk indicates significant difference ( $p < 0.05$ , Student's t-test).

PE=pre-eradicated group, E=eradicated group.

\*Chao 1, \*ACE, and \*Shannon index between PE and E was statistically significant different ( $p < 0.05$ ).
